# Supplementary material for: Sequence- and Structure-Based Analysis of Tissue-Specific Phosphorylation Sites
Source: PLoS One. 2016 Jun 22;11(6):e0157896. doi: 10.1371/journal.pone.0157896 (PMC4917084; doi:10.1371/journal.pone.0157896)
Supplement: S1 Data — (XLSX) [file pone.0157896.s001.xlsx]

## Sheet: Proteins in the PS1D70 dataset
Uniprot Id
Q8BVE8-2
P40201
Q53WY0
P70335
P70339
P70347
Q3UFF9
Q80ZK9
Q6JEL3
Q8BT18
Q3U041
P20781
Q924K2
Q3UKQ5
Q5XII9
Q3KRE8
A2A8F6
Q3TGZ3
Q3UFP6
Q9JJL8
P33174
Q3UT72
Q4QQV3
Q3TJI7
Q9CWW6
Q9WUL0
P54818
A2APU5
Q9D7A3
P16951
Q3ULX4
Q64604
Q9CXG3
Q9CXH7
Q9D7I8
Q52KP1
Q6YDN8
Q9CXN7
Q9DCG6
Q3KRE3
Q5U317
Q9D824
Q9CPV4
Q0VBA4
Q99PT3
Q8K1V9
A3KGQ6
P24822
Q768S5
Q04891
Q3TRJ1
Q9WTN5
Q5DQJ3
Q3TDG9
Q9D8H7
P62716
Q544F9
Q80YW5-2
Q9D8N6
P70662
Q14AM7
Q3TKP4
Q6P7A9
Q3TJN6
Q3TTV6
Q9CZ70
Q9D974
Q80U58
Q8VHZ8
Q9CR78
Q499V6
Q543X6
A2AIR5
Q5U421
Q9ERK0
P47868
Q5M9K7
Q9D9C7
Q9ERQ3
P41230
Q9ESR9
Q3TIR3
Q923V8
Q9DD05
P70701
Q9ES74
Q542R4
Q9D9P0
P40694
Q3U2P8
Q3TWE8
P61265
Q3UMC6
Q3UHT6
Q4V888
Q9CZX9
Q9D3A9-2
Q9D3A9
Q3THH0
Q9ESG3
Q3UFT3
A2RS58
Q9ESK9
Q9DCM0
Q3TG23
Q5BLK1
Q3UQD4
Q3TFI4
P27040
P27046
Q58E49
P19246
Q543U3
Q4FJZ6
Q4KM74
P47942
Q53ZT3
O08574
P11403
Q3UGB9
Q6ZPF0
Q7TPK7
P68136
Q546Q8
Q05909
P20650
Q543E3
Q99J09
P25976
Q3UGS4
Q91Y81
Q641Z4
P42228
Q9JIA0
Q8BSY2
Q6ZWS1
P26687
Q6YDN7
Q99MZ4
P61016
P26435
P19836
A2AD85
Q8BVI9
Q545A2
Q6IMX4
Q3UQX2
Q3TP50
O70145
P59384
P11627
Q05695
Q545K4
Q99KN1
Q8BZS5
Q6PFE0
P80318
Q64213
Q5FWI9
Q8VDP3
Q3UNV7
P63102
P41499
Q543F3
Q543Q4
Q0PD54
Q99LC9
Q0PD39
Q99LH9
Q99LI7
Q3U890
Q542G0
Q542B6
P03995
Q61062
Q63692
A6H630
Q3THR4
Q99M80-2
Q6P9V9
Q5XIF6
P11862
Q7TPB0
A6H6H4
O54724
O54737
O54743
Q99MI1-3
Q99MI1-2
P06907
Q6UY90
Q5BKP5
Q3ZAV1
Q8CD57
Q60520-1
P61967
Q9DA76
Q99104
Q545C7
Q99MX1
Q543D7
Q9JMJ6
P63014
Q3UIK0
Q3TX09
Q9QZC4
Q5BKQ4
Q9DAA9
Q8BSN6
Q00959
Q5SS40
Q8C6E9
P08033
Q99NA9
Q9D9X9
Q8CE60
Q99LF1
Q25C79
Q5F2A7
Q63470
Q03061
Q3TJX0
Q01065
Q01066
Q9JKB0
Q5U2Y2
Q6IMK8
Q5BJS4
Q3U560
Q14AF6
Q9CZB2
Q545G3
Q9JHH8
P08482
P09117
O70577
O70585
P63007
P58404-2
Q544H8
Q3UJS2
P63086
P62632
Q3UG16
Q3KRC3
Q542N5
Q61301
P38650
Q9JHU4
Q61328
O54972
O54982
Q6P8J7
P09605
Q545N7
Q60707
Q8K1N1
A8WCF8
Q6IR19
P50636
Q6IRG7
Q9DBZ5
Q920B9
Q60793
Q3UP78
A1L2Z0
Q9JIG8
Q08460-2
Q3U1U4
Q3TQ70
Q921A2
Q5SV77-3
Q920Q6
Q62059
Q8CAH8
Q6NXJ0
Q8C671
Q6PDU1
Q99PL6
Q9JJ80
Q9EP98
Q0VGZ0
Q9JIZ5
Q8VC03
Q497C3
Q60817
A2A884
Q61481
Q8BRR9
Q9D2V6
Q3UPA1
Q5SWQ8
Q3U3L3
Q8VBW1
Q8VC70
P63329
Q9Z244
Q544C9
Q9JJC6
Q544R5
Q52L79
Q3UWX7
Q921K9
Q0VGJ9
Q3UN66
Q99M28
Q62150
Q62151
Q544G5
Q3URE6
Q8VHW9
Q8VHX0
Q66HA9
Q921W0
Q3UN31
Q921Y4
Q9JJZ5
Q76IJ9
Q61584-3
A1L353
Q60932
Q8CJF7
Q922B1
Q0PD63
P13595
Q542P2
P97290
Q3V3X3
Q5M9K9
Q5RJT0
P28656
P28658
Q8VDG6
Q45V74
Q8VHF9
P58775
Q5XJV5
Q8R1X1
Q09137
Q9D5Q8
P18901
Q8VDM6
Q9QYL8
Q63226
Q8VDN4
Q3TZH7
Q9WU03
Q61686
Q3URL4
Q923A8
Q2THW7
A3QWY0
Q3U8U8
Q9JLG8
P35918
Q62315
Q5I0H3
Q9WUH7
Q9EQS0
Q542D9
Q564E5
Q9JM73
Q9JM76
Q91Z25
Q9WV35
Q9Z270
Q542U0
Q3UEJ9
P97450
Q9R1V3
Q6PDN3
P97479
P97490
P97496
Q924H2
P29452
Q8VFA4
Q9WVA1
Q9R1Q8
Q5XFX0
Q3UZT7
Q3ULV0
Q62425
Q91V17
Q9WVH3
Q3UBU9
Q80ZZ0
Q9WVM1
P52909
Q61850
Q9WVP1
Q3UWU7
Q545P6
Q4V8I7
P67874
O88664
Q5F2E8
Q3KRE0
Q925K9
Q5EAN7
Q3V1Z7
Q9R0A5
Q62367
Q91W69
Q66JY7
Q3TLP8
P98200
Q61955
Q6RKB3
A2RTA0
Q542A5
Q62746
Q99PU8-3
Q91WB4
Q4FK36
Q549X6
P49620
Q53Z43
Q4FK45
Q63604
Q14DQ3
Q545F4
O35226
Q8VHR5
Q3U5W6
Q3U3D4
Q9JK48-2
Q8VHW2
Q544Q4
P06802
P60335
Q8VI84
Q8VI97
P30083
Q5VM59
P97797
P97798
Q1JU68
P23116
Q9QZC5
Q8VID5
Q0ZFS8
Q9QYK2
A2RSP0
Q2TAW4
Q4KM71
Q3KNH8
Q9D424
Q9Z162
Q9Z0W3
Q3TVI5
Q91XW9
Q9JM53
Q91XX1
P21707
P29101
P63142
O88327
Q549F9
Q5DTX6
Q5M964
Q3TSZ8
Q5D0E0
Q5M8P0
Q6V7K3
O70185
P97863
Q9D379
Q91YE5
Q91YE7
Q91YI4
Q9Z1K5
Q91YN0
Q3THN2
P53349
Q62925
P61150
Q3ZB57
Q91Z22
Q9Z1T5
Q9Z1T6
Q9Z1T6-1
Q91YU6
Q91YU8
Q3SXV1
Q91Z83
P02564
Q3TH93
Q3UHV1
Q8R561
Q9Z2B9
Q4V9R2
Q9Z2C9
O88485
Q8BTM8
Q9Z2H7
Q7JCZ1
Q91ZR5
Q8BPU7
Q3U478
Q91X20
Q9QX69
Q497P1
Q3TXM3
Q9CQ02
O88532
Q3UQL2
Q14AI7
O35598
Q9D8L0-2
Q9CQ49
O88574
Q14BV7
Q1HL32
Q5M8C7
Q5NTY0
P63025
Q8BRD3
Q3TXM9
Q9D0B8
Q3UZR4
Q0VGK8
Q6P7P5
Q3UK38
Q9D0E1
Q3U7N1
Q1HKZ5
Q545Q8
Q8BNZ1
Q49S98
Q3ZB20
O35668
O35671
Q9CQR2
Q9D0R8
A2AG05
Q9D133
Q9D0T7
O88667
Q498C8
Q9CQV4
Q68FR3
A4QPD1
Q9CR89
P67779
P56222
Q64362
Q569C9
A6ZI47
Q8K4I6
Q330P7
Q3TN07
Q9DD18
Q3TQH0
Q9D735
Q9D1P4
P32020
P21816
Q9D1S6
Q564E6
Q2KHL4
Q5YLW3
P62828
Q9D2F8
Q9D2J4
A2AJW4
Q53Z05
Q3TY61
A2AWL7
Q3TUF3
O88845
Q3UM33
Q9QXS6
Q9D2Z6
Q9QXX4
Q63918
Q8R491
P47239
P00860
P46662
P46664
Q543N5
Q9QYB2
Q9D3J3
Q9ER30
O35927
Q5RK30
Q9CTN8
P70169
Q0VBU3
A3QQR0
Q9WUV6
Q9D3S9
Q925S8
Q8BQL7
Q9D3V6
Q499D0
P24452
A8CA96
Q569U6
Q8CCQ1
Q3U0U5
Q3UJX3
Q9QZH6
Q543Z5
P10077
Q14AA1
Q9D4R2
Q9QZN4
Q58E59
Q3UPF7
Q9QZS5
Q80TN7
Q8C7Q6
Q3UNH4
Q543H2
P23953
Q9D5D8
P62997
Q63850
P62957
P17105
Q8R084
Q8R0C0
Q8R1B5
Q3TWG5
Q8BIW9
Q8R1U1
Q8R2M2
Q8R316
Q8R332
Q8R367
Q8R3C0
A0PK78
Q8R472
P63047
Q8R4B8
Q8QZV7
Q3UHK6-3
Q3UZW2
Q80SW1
Q9EPR4
Q5U1X0
Q8VDD8
Q3UPG3
Q924W5
Q8K009
Q8K0D7
Q8K0E1
Q8K0V4
Q6P6L6
Q3TJL3
Q8C4P0-2
Q8K1Z0
A0ELI5
Q8K2H4
Q8BLN5
Q8K3H0
Q6P7Q1
Q8K467
Q60I26
Q8K4E0
Q8K4L3
Q80UF7
Q8JZW4
Q3V0N3
Q9CX60
Q8K0F1
Q91XQ0
Q6V4S5
Q543E4
Q5SW83
A2RT50
Q99KK1
Q80UG2
P31648
Q3UGY4
Q61070
Q4KM77
Q80Y56
Q5FVG5
Q9ES52-2
Q3U6P5
Q9Z204
Q9JMD2
P28651
Q5XII3
Q925J9
Q925J9-4
P62270
P25236
Q9WVL1
P54708
Q5M876
Q548L6
P18090
O89084
P54748
A2BDQ4
Q5U3Z5
Q6P7Q4
Q3U0F3
Q8R3N1
P16884
Q5XIJ6
P10247
Q9D3X9
Q6GQQ2
P99027
Q61315
P70478
Q61315-2
Q0VJ96
P70483
O55106
P70486
Q80TF0
P02466
Q3TX57
Q9DB77
Q9EPA0
Q9EPA1
P01830
P41216
Q8R2Y2
Q0VDW9
Q641W3
P28667
Q9EPH2
P54842
Q9ER67
Q9EPI7
Q6NZH0
Q9EPJ0
Q4QR73
P68404
Q8K4P0
O35295
Q9WUF3
Q9EQ25
Q9JK92
P10354
Q6P757
Q9EPY0
A2AIV8
Q6P7R4
P10362
P70562
Q9JKK7
P48303
Q3UUK3
A2AR41
Q1MXF8
P54900
Q499W2
P47709
Q9EQG6
Q80SX9
P56546-2
Q9EQH5-2
P18297
Q08331
Q80W47
Q1HEC0
Q5XIR9
Q3U852
Q5I0I1
Q91WP9
P09811
Q5PQJ8
P09812
A0A509
Q3TI84
Q4V884
Q5M920
Q99JT5
Q9EQR2
O09165
Q6AZ54
Q6P6U2
Q9QVP9
P70600
Q91YU3
P70617
P70625
P70627
Q9EQY3
P02600
Q9QXY2
Q9QWI6
Q9QWI6-2
P10499
Q2KHP0
Q587K3
Q3US32
Q61743
Q8BYI9
Q8CF97
Q6PAH0
P02661
Q8BYC6
Q53UA7
P02680
Q3UY39
Q5U2Y8
P02692
Q3V2F7
Q2KJ09
Q80ZA8
P97434-5
Q6P777
A0PJT4
P47819
Q9ERH3
Q8CFD1
P11101
Q8BHI5
P41232
P09951
O88935
Q3TD17
Q8CFI0-2
Q9ES38
Q8R5J9
Q91XU0
P40615
P70705
A2AG68
Q9Z2U1
Q9CYH6
P70712
Q568Z0
Q9ES67
Q52L66
Q3UFJ3
P14211
Q05683
Q546G4
P02770
Q3B7D0
Q9ESB5
Q4VSW4
Q9ESC2
Q8K221
Q5G856
Q91W40
Q68G30
Q9JK25
Q922J3
Q6AYG7
Q4QR70
Q8QZT2
Q9ESN0
Q9DCU2
Q501L4
Q5DTT2
P11248
Q9D1R9
P04041
Q8VBU7
Q2IBC6
P11798
Q9ESV6
Q9ET58
Q8CGS4
Q8CGS5
Q5U2M6
Q8N7N5
Q9JJK2
Q8CGU9
P56403
Q4TU93
Q8K0T7
Q62770
Q9ERT9
P19103
P10683
Q9Z1B3
P10687
P33568
Q3URY9
P57093
Q9QYB8
Q05764
P26376
Q14AH9
Q68FV7
Q5I0E3
Q9D666
Q9CYG7
Q3KRD5
Q9DBV7
Q91WL0
O88831
P17988
Q8C0V9
Q8K1Z6
Q99N57
P11345
P11348
Q8CHM7
Q6AYW2
Q0VEE6
P10759
Q3UDC9
P26431
P26433
Q5KTC7
Q9QZQ8
Q564F6
P48769
Q5XHY2
P59649
O08587
Q9Z239
Q7TST9
Q4VA43
Q5FVP7
Q66HS7-2
P70338
Q07120
P54763-2
A3KG01
Q9QZB7
Q68FY4
P11497
Q5SWU9
P21263
P27158
Q8CJ42
P10888
A2RSV8
P56627
Q9QYE6
P19357
P14142
P49445
Q8BUM3
O55134
Q9Z266
Q5SWZ0
O08619
Q9EQS4
O08623
O08629
Q5EBP9
Q9Z200
Q8CJB9
Q6DIC7
Q8K4G9
Q9JKC6
Q5FVI4
Q9D0J4
P11506-9
Q3UHJ3
P11506-7
P11506
Q3TQR3
A4QN30
Q5D059
Q4V7B5
O55035
A2AR02
Q99JC6
Q99JD2
Q08EB6
Q08EB5
Q8BRT1
Q99JD4
Q99JE4
Q8VCD1
O55081
Q06647
P27274
Q9ERZ4
Q569C0
Q9CQG9
P10126
Q8C3W1
Q5I0H5
Q3THX4
A2ANP1
Q9D772
Q8CCS6
Q9JLT3
P48961
P30282
O88331
O08773
P97492
O08779
A2APM2
O70150
Q3TYC1
Q6PDG8
Q3TS38
Q8CFC7
P70180
O55147
O08614
P41777
Q6ZQK6
Q9Z2A0
O55173
Q543S8
Q5FVT1
A6H6B3
Q9QXW4
Q6NS52
P49621
Q5M947
Q80TL1
Q8R411
O08664
Q9QZK2
Q5RKG1
Q80VR3
Q5U4F0
Q3UCF2
Q7TQF7
O08838
O70209
Q3UD98
P50279
Q9DCF9
O08873
Q80U28-14
Q9JLB4
O70248
Q8R191
Q9R1R2
P12368
P11711
O08788
P28023
Q3T9V8
Q6IRS7
P28037
Q8CIF2
Q07439
Q9WUT2
Q9WUB8
Q5SUG1
Q5SUF9
Q3UW87
Q5M9I6
Q50HX4
Q2M4H7
A1A5P0
Q91W92
Q504M6
Q3U1V3
A2A7S8-3
A2A7S8
A2A7S8-4
A2A7S8-2
Q5I0J2
Q921U8
Q80ZG5
A1EC95
Q9CQY2
Q99LG1
P20236
Q9D7A8
Q3TJD7
Q2TBE6
Q99M64
P35831
P13084
Q3UMQ1
Q6IRF5
Q61598
Q5XIW8
Q9Z315
O70377
A2AKH4
Q8BGN8-2
P08249
P04642
Q564E2
Q91VC7
A0JPP5
Q544B1
Q8CF60
Q6PHZ8
Q5M853
O54748
O54755
Q8BXT1
Q6AYK6
P81128
A1L1K8
Q3UNP9
Q4KM35
Q5QD51
P13107
Q545J5
Q8K4G5
Q99N27
Q9D566
Q4KLL5
Q9D964
A3KGV1
A3KGV1-2
O54774
Q99N78
Q61143
P43253
Q62432
Q9JLB2
Q99N97
Q543N3
P35426
Q8R2E7
Q5BJX5
Q8C739
Q6P7S6
O88643
P35465
Q3U7E0
Q8R2H3
P14152
Q07647
Q923K6
Q61290
Q66HR0
Q3B8Q1
Q9WUD2
P97291
Q8K0H8
A2VCV8
Q9R1C0
Q4KMA1
A2AE94
Q8C494
Q8R409
Q99NH5
Q5M9H0
Q9ER47
O54852
P27682
Q63575
Q5I2Z0
Q543N7
Q3TWY9
P50503
Q3TYV5
P13233
Q9JHB5
P13264
O70531
Q3U4D5
P05432
O54821
Q9JHK1
O70594
Q9JHR7
Q5SUC3
P35565
A7BKC9
P35569
P35570
Q9QYR6
A2ARP8
P34926
Q9QYR6-2
Q5M890
Q9JK37
Q7TPE5
Q6PGF7
O54924
Q01129
Q9ET78
Q2PS20
Q9JHU5
Q66HK1
Q9JHW0
O54963
Q9JHX4
Q8C2Q3
Q3UKN6
Q9JI85
A9UMW3
Q3TET7
A2AEW8
Q9JHZ9
Q8K1G0
Q58E35
P19945
Q99P38
Q920A6
P70271
P36202
Q6DFV7
O70601
Q546H1
O70608
Q3TKT4
Q8K1Q0
Q4FZY0
Q6DG50
Q5XIL8
Q9JID1
Q61823
Q99P97
P97924
Q641W6
Q920G0
Q3UND0
Q920G2
Q9JHL1
Q9Z0Z4
Q8BWG8
Q3UNH3
Q920J4
Q8BG16
Q6VEU8
Q9JIK1
Q920L0
P12785
Q9Z1X4-3
Q9JIL3-2
Q9JIL9
Q9JIM0
Q76JQ2
P04937
P11276
O88990
Q8R4I6
Q4FK28
Q5M851
Q920Q3
P28480
P49797
Q9JJ09
Q8R1G6
Q6AYD6
Q920R4
Q5SWY7
Q9JJ10
Q9JIR1
Q99NE5-4
Q9JIR4
Q99NE5-5
Q99NE5-3
Q3TG37
Q9JJ19
Q9JJ22
Q3LS20
Q6GQT5
Q9JJ40
Q9JJ54
Q8R511-2
Q8R4R3
Q8R515
Q9DCD2
Q8R4S0
Q9JIX5
Q9D1J2
Q8R4T5
Q542F4
Q99L02
Q5M865
Q3U9B2
Q8R553
P14046
O88987
Q66HC6
Q3UPN9
P85125
Q99PS2
Q99PS8
Q6AY81
P57725
P13437
Q91W32
Q9WU49
Q5M9N9
P13541
Q9JJH5
Q9JI03
Q4KM32
Q3U2K4
P05696
Q4VA93
Q5XI97
A2VD12
Q9DBT3
Q8R5M4
Q8CJH5
Q3MIE4
Q9JJS5
A8ASI9
Q543K2
Q5XFX1
Q5BJY4
Q61464
Q498U0
Q9JKA8
Q564E8
Q6GQU1
P05708
P12928
Q7TQ70
Q8K3X0
Q6P686
O54952
Q91X56
Q9JKM5
Q5XIL0
P58751
Q9JHS9
Q6VH22
Q5U1X7
Q63257
P52164
Q3TYJ0
P82252
P51514
Q9WTP0-2
Q68G21
Q62952-2
Q9WU06
Q62407
Q63638
Q8BUZ1
Q8K4K7
P62141
P51583
Q9DCL9
Q8K4M9
Q9WTY2
Q8VEL9
Q6P7A8
Q9JLD2
P62751
Q8K4R8
Q6PE13
P13676
Q99P31
Q4V8E4
Q4L0E8
Q3U367
Q0KL01
Q8K585
Q566K0
O08564-2
Q4FZS1
Q4V8B3
Q4V793
Q9ES18
Q5U2U8
Q8K2P7
Q9WUH8
Q9JLS3
Q923T0
Q9WUI9
Q7TPU7
Q9JLT5
Q3TDI2
Q9WV95
Q9JLU4
Q7M6Z3
Q8K5B0
Q6GQY2
Q6AXX4
Q923V4
Q6AXR7
Q6AYY8
Q9JM80
A6H659
Q9JLY8
Q3V1K5
P21571
Q3UCB5
Q00972
Q9R0P9
Q9WV48
Q8K3M6
Q5J8K6
Q91VC4
Q3TBW1
Q9JMC1
Q8CD76
P37285
Q8BGY9
Q9JMG6
Q3U1J1
Q8CGN5
P43884
P70452
Q08850
Q63003
Q99PN0
Q8BYW1
P28818
Q63014
A1BPI0
Q9WVB9
P51141
Q03347
Q63046
Q924N5
Q99PU5
Q9WVC7
Q3UHI8
Q2VEB3
P70398
P30082
Q63083
P01966
Q5PQP4
Q63092
Q60749
Q91V33
Q924U5
Q9WVJ6
P22288
Q5XI67
Q9JJW5
P21643
P15083
Q91YE8
Q66H45
O35821
Q3U2W2
Q9WVR6
Q9WVR8
Q9WVS9
A2ARV4
P98158
P13803
Q9WVT0
Q542V3
O35094
Q9Z0E0
O35095
P97520
P97526
Q04690
Q5EBG6
P97541
P37377
P97549
Q9R0N9
Q6P5E4
Q8BZN2
Q925D4
Q5QE80
P97564
P37397
P97577
Q925F0
P97586
Q6P7A6
Q5CZZ9
Q9R044
Q6PIE5
Q9R063
Q63100
Q63116
O35492
Q6IR34-3
Q6IR34-2
P46686-2
Q5XIB5
Q63120
Q5RK33
Q5FVM4
Q63158
Q9ESG9
Q6IRL5
Q63185
P30191
Q68FU8
Q01714
Q91W30
Q75N33
Q01728-6
Q059K7
Q3B7L3
P15146
P52481
O35141
O35147-2
O35147
Q6P9N1
A6H656
Q5M7A3
Q6AYT4
Q14AG7
P97613
P51885
Q62417
Q8C129
Q9Z109
Q3SWT0
Q4QR75
P06762
P06765
Q9R0T3
Q810U3
P97685-2
P97685
Q924B0
Q9R189
Q7TNE3
Q9JKE5
Q8VHF0
Q8VHF5
P70227
Q63269
Q63276
Q63279
P19001
Q3TII9
Q62622
Q62627
Q9WU74
Q99KG5
P15207
Q01827
Q62662
Q6PDU6
Q62671
Q9Z0Y9
Q62688
Q3USB7
Q62689
Q8VI02
Q8K2V1
Q8VHQ7
P52590
P52591
Q3U425
Q3UPH6
Q5RKK1
O35254
Q8VHT6
Q61206
P17156
Q6R891
P14669
Q3U102
Q5FVM3
O88269
Q9R1P9
P97756
Q3UEE8
P56399
P60840
Q9Z0G8
Q9R0G7
Q3URW5
Q4KM95
Q6P791
A2AS85
P06883
Q5M7U8
Q91XT6
Q6PDH0-2
Q9D842
Q3U4B8
Q61161
Q8VIB1
Q8VIB2
Q63327
Q542H7
Q4KLY7
Q5SYD0
Q5HZA4
A6H624
Q63836
Q63366
Q5M9L0
Q8BI29
Q5M971
Q62720
Q4KML9
Q62728
Q76LU9
Q3UR33
Q62733
Q61033
Q02563
Q9JIS5
P11031
Q91XS7
Q9Z136
Q505F1
Q9Z0U4
Q62751
Q5PQX1-2
Q5PQX1
Q99L43
Q91XU8
P63017
Q9DCC8
Q8VIL3
Q9JKB3
Q3KRC7
Q62764
Q547S9
Q543Y7
Q9Z0W5
Q91WW8
Q9Z173
Q569Z5
Q62784
O35303
O35303-6
Q91Y77
Q91Y78
Q61526
Q62799
Q91Y80
Q99MZ6
Q99MZ3
Q8VIP2
Q91Y94
P15385
Q03717
P15387
P63216
O88321
Q80VP1
Q5XII5
Q5F271
Q4KM33
Q9Z1B2
Q0VF59
Q8BJ42
P97837
Q5U4E6
Q91VW5
Q642A5
Q9Z1D6
Q3UIZ0
P97874
Q30A71
Q66H79
Q9Z1H9
Q9Z1J8
Q545A5
Q64060
Q545M2
Q9Z1K2
Q3UEK4
Q9Z1M9
Q3TWI4
Q45QJ4
Q9Z1N3
Q5U4F2
Q548L0
Q62806
Q3THU8
Q6IRS8
O35382
Q62824
Q6NXW0
O55098
Q62834
Q91WG2
Q9Z1T4
Q80YA9
Q62847
Q3UNK1
Q9Z254
Q9Z258-2
Q62865
Q9Z1W6
Q9Z269
Q9Z1X1
Q68FF6
Q9Z272
Q62881
Q62885
Q9Z2R6
Q69ZK9
Q69ZI4
O35413
Q5XIX3
O89035
Q921S6
O89038
Q6PE62
O35430
Q3UVC9
Q3KR83
Q6AYM0
P37727
Q6AYH9
Q924N4
O88453
Q3KR64
O88480
Q5SVI1
Q5SVJ0
Q920Q0
Q542N8
Q8CB16
Q6VGS5
Q9Z2I7
Q9Z2J5
Q63520
A2RSE7
O35685
Q63525
P11881
Q505N6
Q64332
Q63544
Q5GQ64
Q3U1N0
Q91ZN1
P30551
P30553
Q8VDU5
Q9Z2P4
Q9DBX1
Q62901
Q9Z2P5
Q63560
Q7TSJ2
Q63562
P23347
Q63564
P23348
Q68EG4
P00481
Q9Z301
Q3TN36
Q9Z2Q1
Q62910
Q62910-4
Q9Z2Q7
Q91ZQ0
P48966
Q62920
Q2Q7P0
A2ASS6
P39020
Q99M23
Q5BJP5
Q9Z2T2
P97772
P23385
A5D6P2
Q9Z340
P22734
Q3UYD3
Q642E5
P39052-3
Q9R0Y5
P39069
Q9Z2X1
Q811L7
Q9Z2X5
Q62985
Q78ZJ8
O35509
Q9Z2Y1
Q62991
Q642G4
P52873
Q05920
Q68G44
O35531
Q9QUH3
A1L1K6
Q4QR76
P07722
Q80Y52
Q4G059
Q922M5
P70232
P46460
Q3UN16
Q8C196
P07756
Q9DAZ5
O88553
Q3TIV5
Q6U6G5
P31210
P05202
Q64256
Q64268
P24050
Q6DID3
Q63623
Q63624
Q63625
Q63633
Q3UA21
Q64298
Q4V9Z9
Q03484
P09006
Q3ULN8
Q3UJ34
P09034
Q9CPN7
P51174
P07808
P07825
Q91XD4
Q3USD5
O88637
Q8BH64
O88644
P32755
Q04117
Q64303
Q8CIN4
Q3TN39
Q64319
P01257
P01283
Q63714
Q8C1A5
Q63716
P54256
P31390
A1L1I2
Q63754
Q3UHN4
P54282-2
P54282
Q8K5A7
P54287
Q63767
Q6PDV1
P23565
P70304
Q01853
Q8BNF8
Q5M7A4
Q5M836
Q62698
Q6PDL0
Q9DAS9
P06837
P07936
Q8VCU0
Q62077
P10686
Q99KZ6
Q9CR49
O88758
Q3KR62
Q6PF93
Q9QX10
Q91XF0
P98078
O88797
Q14BI2
Q3UVX5
Q8BMS1
Q64428
Q03626
Q63801
Q9QX75
Q8BG67-2
Q9QX81
P23606
Q6P783
Q9CQP2
P16443
P47196
Q3TY95
Q3HSE5
P53767
Q9QXI6
Q9JKS4
Q3THQ5
Q546X9
O35815
Q6AYH5
Q3TPZ5
Q9QYJ0
Q9QXI4
Q99PV8
Q9JHW1
O88806
O35854
Q9WTU3-3
O35867
Q7TN74
P61219
Q9QZQ1
O35889
O88846
Q9QXN5
Q9QXN4
P55009
Q8K342
Q5PQV1
Q9QXQ0
Q9QY02
Q68G14
Q9QXS4
O08716
Q9QXT3
Q9QXU8
Q9QXU9
Q64542
Q64548
Q64568
Q8R5H6
Q3UQ85
Q811X6
P11507
Q8R429
Q64518
Q64578
Q9QXY4
Q812D1
Q99JF8
Q9WVH4
Q3T9S3
Q3TR66
Q3TYS2
P16573
A3KGS3
Q5XIK5
Q9Z0L0
P08733
P51667
O35910
O08874
Q4V7C0
A2RRK3
O08815
P32215
Q9QYM0
Q9QYM2
O88622
P32232
P55108
Q80T22
P25030
Q64602
Q8K566
Q3UKY1
Q64617
P55146
Q9QYU3
Q9QZ48
P31647
P31650
P36916
Q6MG06
P33611
Q4V8M9
P35505
P25093
Q9QYW0
A2AB79
Q8BJI1
P31662
Q9QZ76
Q3UVB1
P16610
Q91V92
Q3V117
Q5PQL9
P46720
Q80W98
Q6MG77
Q3UZ01
Q4G055
Q544N9
P53987
O55164
Q5PQT0
P09495
Q9QZH2
Q6PAM0
Q3TVM1
Q60597
Q8VEB3
Q7TQ89
P55207
Q3UHB6
Q80UG5-3
Q9QZR8
Q9Z1R4
Q6MG49
P55266
Q9QZU7
Q924Y0
Q6MG88
Q3TUQ7
Q52L78
P24587
Q6MGC7
Q80XM9
Q4FJQ0
[truncated: 3,287 more rows]

## Sheet: Proteins in the PS3D90 dataset
Uniprot Id
Q9JJV2
Q8R0H9
Q99JZ4
Q5U421
A8IP69
Q9WTX5
Q9JM76
Q3UKW2
Q9QXN5
Q9QXN4
Q3TQR3
P48500
Q6SA19
Q68FD5
Q5SXR6
P48193
P47942
P51583
Q9DCL9
Q4FK59
A3KML3
Q6NXW0
P68511
Q6AZ33
Q6P8Q0
Q62623
Q6A4J8
P05696
Q9WV63
P63329
Q78ZJ8
A8DUV3
O35490
Q6ZWS1
Q9ESV6
Q3TD51
Q6AYW2
Q920G0
Q3UWU7
Q5RKN9
Q923G3
P47757
P31044
Q5EBQ2
Q9JK42
Q60932
Q3U478
Q3ZB97
P13221
P27040
P63017
Q3TAQ8
Q7TP58
Q543P7
P68136
P06745
P47934
P52759
Q5U463
Q3UNH3
P56399
O08557
Q8CIF2
Q6PAM0
Q6P3Z3
Q499E3
Q9CWS0
P07323
Q3TYJ0
Q71LX8
Q9R0T3
Q542H7
Q542G9
Q0VF51
Q9JLV6
Q02053
P62828
P14668
Q4KML7
Q542K0
P09812
P11348
Q5M9K1
Q8BVB0
P26443
Q5QE80
Q91XF0
P02625
Q545M7
Q542K4
Q66HT1
Q3UER1
P00884
P02692
Q3V2F7
Q91YD3
Q5F2A7
Q62108
P14152
P30999
P13707
P16045
Q91W30
Q03336
P07953
Q3U890
P35505
Q3UAT9
Q8VHF5
P32755
Q05920
Q5SUC3
P35565
P11497
Q3UFJ3
P01966
Q3TIE8
O88990
Q80ZV0
P11517
P11798
P52164
Q923J1
Q3UJ34
P09034
P14141
P16015
Q63716
P62889
Q62689
Q8BNM3
P08010
P15626
Q3TYV5
P13233
Q8R4B4
Q5NC82
Q544B1
P22985
Q3UL35
Q9D7X3
Q99MS0
Q9D0J4
Q64213
P00860
Q9R0P9
P39069
Q9Z1F9
Q545F0
Q99KI0
P08249
Q3UG16
Q9CQP2
P07379
Q8BSX3
P52480
P22449
Q4FK28
Q543S2
P12928
Q7M6Z3
P06802
Q63429
Q04447
Q3UJS2
P70304
P10719
Q9DBJ1
Q8C196
Q9WUB3
P35283
Q8BTM8
Q64525
Q3V117
Q3UMQ2
P21816
Q6UPE1
P19157
P21707
Q2M4H5
P97479
P06240
Q9EQS0
P14646
P63086
P34152
P22288
Q0D2L6
Q9JHR7
Q540D7
O08699
Q6PJ91
Q3UCJ0
Q03265
P15999
Q07523
Q8BYI9
P01946
P62775
Q3UHC4
P04642
Q564E2
Q5SS40
P02091
Q6P9Q4
P31324
Q61553
Q5SVI1
P25093
Q3UHS6
Q3TJD7
Q6PAH0
P54818
A2RRK3
Q56A15
Q3UBP0
P11960
Q9JM53
Q5FWI9
Q3UZT7
Q4FZZ3
O55043
Q548F2
Q3TT11
Q6S392
Q9D566
P00481
P39053
P41499
P70565
Q8BSH3
P68181
Q8R429
Q78ZM0
Q3UGY4
Q545Q8
Q9CPV4
O55098
Q3USE0
Q3UIB2
Q9D964
P84025
Q99K51
P50411
P42123
P16125
Q62920
Q3TLP8
P50247
Q5XI73
P70271
Q02111
Q9ERU9
Q6P6V0
Q63470
Q68G44
Q3TQ70
P09411
Q8VDC3
Q5U2R0
P84079
P57113
P63102
P04797
P16858
Q5SX50
O70589
P20029
Q921E6
Q6P7A6
Q9CQ49
Q9WU49
Q3UAD6
Q7TMB8
Q5XIM7
Q542F1
Q3U1J4
Q6IMZ3
Q497P1
P61765
Q01853
P61750
Q91Y78
Q6P069
Q91WP9
P09811
P09951
P05202
Q6P9V9
Q9CQX0
Q924B0
Q8BVI9
P05065
Q8CBB7
Q6GQU1
P05708
Q9D1A2
Q9WTS2
Q50HX4
Q564E6
Q6P8J7
P09605
Q304F3
P46460
P04905
Q8CB83
A2AB79
Q3TKP4
Q61206
Q7TT49
Q3UNI8
Q3U6M5
P13803
Q53ZT3
Q0PD63
Q3KRE8
O09165
P54116
Q545N7
Q2TAW4
A2RTA0
Q63844
Q64727
Q4FJQ0
Q543Y7
Q3TCS3
A6ZI47
Q5FWB7
Q9CPQ9
P40142
Q5RJV4
Q6PIE5
