# Supplementary material for: Sequence- and Structure-Based Analysis of Tissue-Specific Phosphorylation Sites
Source: PLoS One. 2016 Jun 22;11(6):e0157896. doi: 10.1371/journal.pone.0157896 (PMC4917084; doi:10.1371/journal.pone.0157896)
Supplement: S2 Data — (XLSX) [file pone.0157896.s002.xlsx]

## Sheet: Sheet1
Kinase	Tissue	Expression	Corrected p-value of the expression	Corrected p-value for tissue preference
PKA	brain	145.448	0.969235	4.55019e-24
	testis	433.979	0.000331699	4.4898e-32
	pancreas	24.7168	0.0337764	3.24219e-06
	liver	287.913	0.0189633	4.82642e-11
	kidney	18.7511	0.0278421	1.32116e-13
	spleen	65.8408	0.127567	2.27063e-15
	lung	48.0801	0.0721942	1.52972e-10
	heart	62.5847	0.115066	2.44451e-11
AKT1	brain	13.3575	0.00868939	0.000220633
	testis	15.2856	0.00205112	0.00039009
	pancreas	2.69342	0.0542901	0.32317
	liver	0.0567775	0.00636917	0.0138219
	kidney	0.206148	0.00715088	0.463251
	spleen	10.0865	0.127367	0.0121102
	lung	8.67821	0.371017	1
	heart	3.15686	0.0798467	0.0933364
ATR	brain	0.112546	0.361635	0.000144466
	testis	1924.26	0.00410477	1.34354e-07
	pancreas	1.02874	0.362888	0.000216244
	liver	0.205693	0.361762	2.86217e-06
	kidney	NaN	NaN	1.99188e-09
	spleen	4.97605	0.368329	7.33329e-13
	lung	NaN	NaN	2.46846e-10
	heart	0.026644	0.361518	0.000397051
AURA	brain	0.0229815	0.5	0.0160663
	testis	1.11977	0.5	0.000103765
	pancreas	NaN	NaN	0.0661191
	liver	NaN	NaN	0.734872
	kidney	NaN	NaN	0.0416856
	spleen	NaN	NaN	0.228591
	lung	NaN	NaN	0.00701498
	heart	NaN	NaN	0.0334152
CAMK2	brain	63.7867	0.00172154	1.90366e-15
	testis	8.42699	0.0517529	3.68159e-30
	pancreas	1.85752	0.014608	0.000274542
	liver	0.104587	0.0105235	4.02984e-11
	kidney	3.56957	0.0202222	1.1618e-13
	spleen	38.8652	0.169674	8.54402e-17
	lung	37.2198	0.228438	4.70196e-12
	heart	54.5631	0.00849873	3.52875e-06
CDK2	brain	NaN	NaN	0.238159
	testis	56.6957	0.0288613	0.476291
	pancreas	0.383846	0.178504	0.000241836
	liver	0.0493836	0.172332	4.69326e-10
	kidney	0.0828983	0.172941	5.75256e-11
	spleen	59.7307	0.0218428	0.00233466
	lung	0.237811	0.175783	3.36298e-05
	heart	NaN	NaN	7.85176e-09
CK2	brain	350.877	0.000370788	4.42525e-05
	testis	249.273	0.0192824	3.31124e-10
	pancreas	31.5912	0.00913278	0.0616501
	liver	60.6202	0.0330454	5.86674e-12
	kidney	113.658	0.334199	3.86004e-15
	spleen	145.952	0.932439	9.2303e-13
	lung	131.82	0.631277	2.00297e-28
	heart	199.664	0.178147	2.33677e-06
ERK1	brain	175.15	0.015824	0.000318226
	testis	209.37	0.00296006	0.000254405
	pancreas	37.7735	0.14752	3.66046e-12
	liver	7.8532	0.0308015	1.39341e-11
	kidney	20.0997	0.0588083	2.55268e-15
	spleen	77.3842	0.800185	0.000422342
	lung	212.64	0.00254704	2.31213e-08
	heart	10.975	0.0363091	3.14917e-12
GSK3B	brain	76.1312	0.00165627	5.66969e-15
	testis	48.532	0.0856331	1.29941e-35
	pancreas	15.9164	0.26004	4.9885e-06
	liver	0.186411	0.0253666	3.6596e-36
	kidney	6.03692	0.0615244	2.09678e-23
	spleen	29.9623	0.881405	1.04889e-38
	lung	74.1979	0.00212074	8.96337e-40
	heart	0.664645	0.0272596	2.59852e-14
NEK6	brain	0.253141	0.904043	1.04509e-07
	testis	0.692817	0.00518421	6.85624e-10
	pancreas	NaN	NaN	3.8157e-08
	liver	NaN	NaN	7.80943e-15
	kidney	0.0767431	0.145865	1.43149e-11
	spleen	0.122608	0.26979	2.61186e-19
	lung	0.226972	0.888618	4.26792e-20
	heart	0.0739424	0.140453	4.12395e-08
PKCA	brain	92.6732	0.494633	2.23986e-06
	testis	0.555081	0.206261	1.11253e-05
	pancreas	0.281004	0.204417	1
	liver	0.0344103	0.20277	0.839913
	kidney	0.327649	0.20473	0.427544
	spleen	402.399	5.50382e-05	0.108013
	lung	53.633	0.868731	1
	heart	0.19782	0.20386	0.614939
PKD	brain	0.582213	0.307376	4.49975e-06
	testis	1.30569	0.528487	1.48091e-14
	pancreas	NaN	NaN	9.75542e-05
	liver	NaN	NaN	0.00136089
	kidney	NaN	NaN	3.50534e-13
	spleen	0.836952	0.372749	5.32673e-10
	lung	6.48383	0.058465	7.90982e-09
	heart	NaN	NaN	0.0268718
